# Supplementary material
Source: publisher figshare collection journal article supplement (https://gsapubs.figshare.com/ndownloader/files/22747283)
Supplement: Supplementary file 1 [file 22747283]

## **Data Repository**

### **The Discrepancy between Mineral Residence Time and Soil Age: Implications for the Interpretation of Chemical Weathering Rates**

Kyungsoo Yoo<sup>1</sup> and Simon Marius Mudd<sup>2</sup>

<sup>1</sup>University of Delaware, Plant and Soil Sciences Department, Newark DE, USA,  
kyoo@udel.edu

<sup>2</sup>School of GeoSciences, University of Edinburgh, UK., simon.m.mudd@ed.ac.uk

## **Derivation of Eq. 3**

The mass loss rate of mineral species  $j$  per unit ground surface area via chemical weathering ( $w_j$ , with the unit of  $\text{ML}^{-2}\text{T}^{-1}$ ) is described as:

$$w_j = -\frac{\partial m_j}{\partial \tau_j} = R_j A_{s,j} \omega_j. \quad (\text{A})$$

where  $m_j$  is the mass of mineral  $j$  per a given ground surface area [ $\text{ML}^{-2}$ ],  $\tau$  is the time that the minerals are exposed to chemical weathering reactions,  $R$  is the chemical weathering rate in moles reacted per mineral surface area per time [ $\text{mol L}^{-2} \text{T}^{-1}$ ],  $A_s$  is the mineral surface area per ground surface area [unitless], and  $w_m$  is molar weight of the mineral  $j$  [ $\text{M mole}^{-1}$ ],

1 The surface area of the minerals per ground surface area [ $A_s$ , unitless] is related to the  
 2 mineral grain roughness by [White and Brantley, 2003]:

3

$$4 \quad A_{s,j} = \frac{6\lambda_j}{D_j \rho_{\mu,j}} m_j, \quad (\text{B})$$

5

6 where  $D$  is the grain diameter [L],  $\lambda$  is the mineral surface roughness [unitless], and  $\rho_m$  is  
 7 the density of the minerals [ $\text{ML}^{-3}$ ].

8

9 Both the mass and the surface area of the minerals may evolve due to chemical  
 10 weathering. In the model presented here we adopt the *White and Brantley* [2003]  
 11 weathering model, which describes the chemical weathering rate per mineral surface area  
 12 and the mineral grain roughness as a function of the mineral's exposure time to chemical  
 13 weathering as

14

$$15 \quad R_j = a_j \tau_j^{\alpha_j}, \quad (\text{Ca})$$

16

17 and

18

$$19 \quad \lambda_j = b_j \tau_j^{\beta_j}, \quad (\text{Cb})$$

20

21 where  $a$ ,  $b$ ,  $\alpha$ , and  $\beta$  are mineral species specific empirical coefficients.

22

1 Thus the mass loss rate of mineral species  $j$  per ground surface area via chemical  
 2 weathering ( $w_j$  in Eq. A) can be rewritten as in the Eq.3 in the text:

3

$$4 \quad w_j = -\frac{\partial m_j}{\partial \tau} = \underbrace{\frac{6a_j b_j \omega_j}{D_j \rho_{\mu,j}} \tau_j^{\alpha_j + \beta_j}}_{\substack{\text{time-dependent} \\ \text{rate coefficient} [\text{yr}^{-1}]}} \times \underbrace{m_j}_{\text{current mass}}. \quad (\text{D})$$

5

6 This equation describes a first order decay with time-dependent decay rate; the rate  $W_j$  is  
 7 the product of the time-dependent rate coefficient and the current mass of  $j$ . If the initial  
 8 mass per area of the mineral  $j$  is  $m_{j,0}$ , the  $m_j$  in Eq. D can be solved as a function of  
 9 weathering exposure time ( $\tau$ ) and the initial mass ( $m_{j,0}$ ):

10

$$11 \quad m_j = m_{j,0} \exp\left[-\frac{6a_j b_j \omega_j}{D_j \rho_{\mu,j} (1 + \alpha_j + \beta_j)} \tau_j^{1 + \alpha_j + \beta_j}\right]. \quad (\text{E})$$

12

### 13 **Derivation of Eq. 4:**

14

15 Over the course of soil formation, primary mineral grains of different species are  
 16 continuously incorporated into the soil. The amount of mineral,  $j$ , per unit ground surface  
 17 area that enters the soil from the underlying fresh parent material via soil production  
 18 between the time period of  $t$  and  $t+dt$  [ $m_{j,t}$  with the unit of  $\text{ML}^{-2}$ ], where the  $t$  is the soil  
 19 age, is:

20

$$m_{j,t} = (\rho_r C_{j,r} P_t) dt, \quad (F)$$

2

3 where  $\rho_r$  is the bulk density of the parent material [ $\text{ML}^{-3}$ ],  $C_{jr}$  is the mass concentration of  
 4 the primary mineral  $j$  in the parent material [ $\text{MM}^{-1}$ ], and  $P_t$  is the soil production rate at  
 5 time  $t$  [ $\text{LT}^{-1}$ ].

6

7 Now we consider a soil of age  $T$ . As described in the time-dependent dissolution  
 8 rate law described in Eq. D, the mass loss rate via chemical weathering from the mass  
 9 fraction,  $m_{j,t}$  in Eq. F, is the product of (1) the time-dependent reaction coefficient for the  
 10 weathering exposure time of  $T-t$  and (2) the present mass of  $j$  that entered the soil  
 11 between  $t$  and  $t+\Delta t$  and has survived the chemical weathering loss until time  $T$  (i.e.,  
 12  $m_{j,t \rightarrow T}$ ).

13

$$w_{j,t,T} = \frac{6a_j b_j \omega_j}{D_j \rho_{\mu,j}} (T-t)^{\alpha_j + \beta_j} \times m_{j,t \rightarrow T}. \quad (G)$$

15

16 As was done for Eq. E,  $m_{j,t \rightarrow T}$  can be solved as a function of initial mass ( $m_{j,t}$  in Eq. F)  
 17 and the residence time,  $T-t$ .

18

$$m_{j,t \rightarrow T} = (\rho_r C_{j,r} P_t) dt \exp\left[-\frac{6a_j b_j \omega_j}{D_j \rho_{\mu,j} (1 + \alpha_j + \beta_j)} (T-t)^{1 + \alpha_j + \beta_j}\right] \quad (H)$$

20

1 The soil of age  $T$  is comprised of primary minerals that have been incorporated into the  
 2 soil during the entire duration of soil formation. The mass loss from the mineral species  $j$   
 3 in the entire soil profile ( $w_{j,T}$  with the unit of  $\text{ML}^{-2}\text{T}^{-1}$ ) can be thus obtained by integrating  
 4  $w_{j,t,T}$  (Eq. G) over the time period from  $t=0$  to  $t=T$ .

$$6 \quad w_{j,T} = \int_{t=0}^{t=T} w_{j,t,T} dt, \quad (\text{Ia})$$

$$8 \quad = \frac{6a_j b_j \omega_j}{D_j \rho_{\mu,j}} \int_{t=0}^{t=T} \left[ (T-t)^{\alpha_j+\beta_j} (\rho_r C_{j,r} P_t) \exp\left[-\frac{6a_j b_j \omega_j}{D_j \rho_{\mu,j} (1+\alpha_j+\beta_j)} (T-t)^{1+\alpha_j+\beta_j}\right] \right] dt, \quad (\text{Ib})$$

$$10 \quad = \frac{6a_j b_j \omega_j}{D_j \rho_{\mu,j}} \int_{t=0}^{t=T} \left[ (T-t)^{\alpha_j+\beta_j} m_{j,t \rightarrow T} \right] dt, \quad (\text{Ic})$$

12 Eq. (Ic) follows from Eq. (Ib) by inserting Eq. (H) and is featured as Eq.4 in the text.

### 14 **Derivation of Eq. 5**

16 If we incorrectly equate the mineral residence time ( $\tau=T-t$ ) and soil age ( $T$ ), as has  
 17 been done in the past, the chemical weathering rate of mineral species  $j$  from a soil of age  
 18  $T$  is described in Eq.5 in the text:

$$w_{j,T} = \underbrace{\frac{6a_j b_j \omega_j}{D_j \rho_{\mu,j}} T^{\alpha_j + \beta_j}}_{\substack{\text{time-dependent} \\ \text{rate coefficient} [\text{yr}^{-1}]}} \times \underbrace{(\rho_s C_{j,s} h_s)}_{\text{current mass}}. \quad (\text{J})$$

2

3 where the current mass of mineral  $j$  is calculated as the product of soil bulk density, mass  
4 concentration of  $j$ , and soil thickness at time  $T$ .

5

## 6 **Simulation Procedure**

7

8 In the simulations, mineral grains are introduced into the soil during each timestep. The  
9 mass per unit ground surface area of the mineral grains introduced during a timestep of  
10 time  $dt$  is

11

$$m_{j,0} = P \chi_j \rho_{\mu,j} (1 - \phi) dt, \quad (\text{K})$$

13

14 where  $P$  is the soil production rate, determined by the soil thickness (see text),  $\chi_j$  is the  
15 volume fraction of the mineral in the parent material (mass fraction and volume fraction  
16 are assumed to be the same in the simulations presented here because quartz, plagioclase,  
17 and K-feldspar have similar mineral densities),  $\rho_{\mu}$  is the mineral density of species  $j$ , and  
18  $\phi$  is the porosity, assumed to be 0.4 for all simulations.  $\rho_{\mu} \chi_j (1 - \phi)$  is identical to  $\rho_r C_{jr}$  in  
19 Eq. (F). It should be noted that the simulated particles represent a cohort of individual  
20 mineral grains that are produced in the time period  $\Delta t$ . Each mineral grain is then tagged  
21 with an age; the clock starts once the mineral grain is introduced into the soil layer.

1

2 As time passes, the soil-profile-integrated mass and weathering rate of the mineral  $j$  is  
 3 updated according to Eq. (I). Thus the mass in the total soil profile and also of individual  
 4 mineral grains of a range of residence times is tracked. The soil thickness is determined  
 5 by summing the contribution of all the mineral grains that reflect mineral species groups  
 6 and number of mineral particles within each group:

7

$$8 \quad h = \sum_j^{\#species} \sum_n^{\#particles} \frac{m_{j,n}}{\chi_{j,i} \rho_{\mu,j,n} (1-\phi)}. \quad (L)$$

9

10 This soil thickness is then used to determine  $P$  in the following time-step with Eqs. 2a or  
 11 2b.

12

### 13 **A Note on Residence Time**

14 In the simulations, we track the time lengths that individual mineral grains spend in the  
 15 soil. The residence time is calculated based on the average of those time lengths. The  
 16 mineral grains, however, may have different masses (due to, for example, differential  
 17 weathering of varying soil production) such that the residence time is calculated by  
 18 weighting the time lengths of the mineral grains by their masses.

### 19 **Reference**

20

- 1 White, A., and S.L. Brantley (2003), The effect of time on the weathering of silicate
- 2 Minerals: why do weathering rates differ in the laboratory and field?, *Chemical Geology*,
- 3 202, 479-506.

4
